# Supplementary material
Source: Springer Nature journal article supplement (https://www.springermedizin.de/resource/supplementary/12885_2012_3314_MOESM2_ESM.pdf/9463220)

Additional file - Fig. S1, A-E

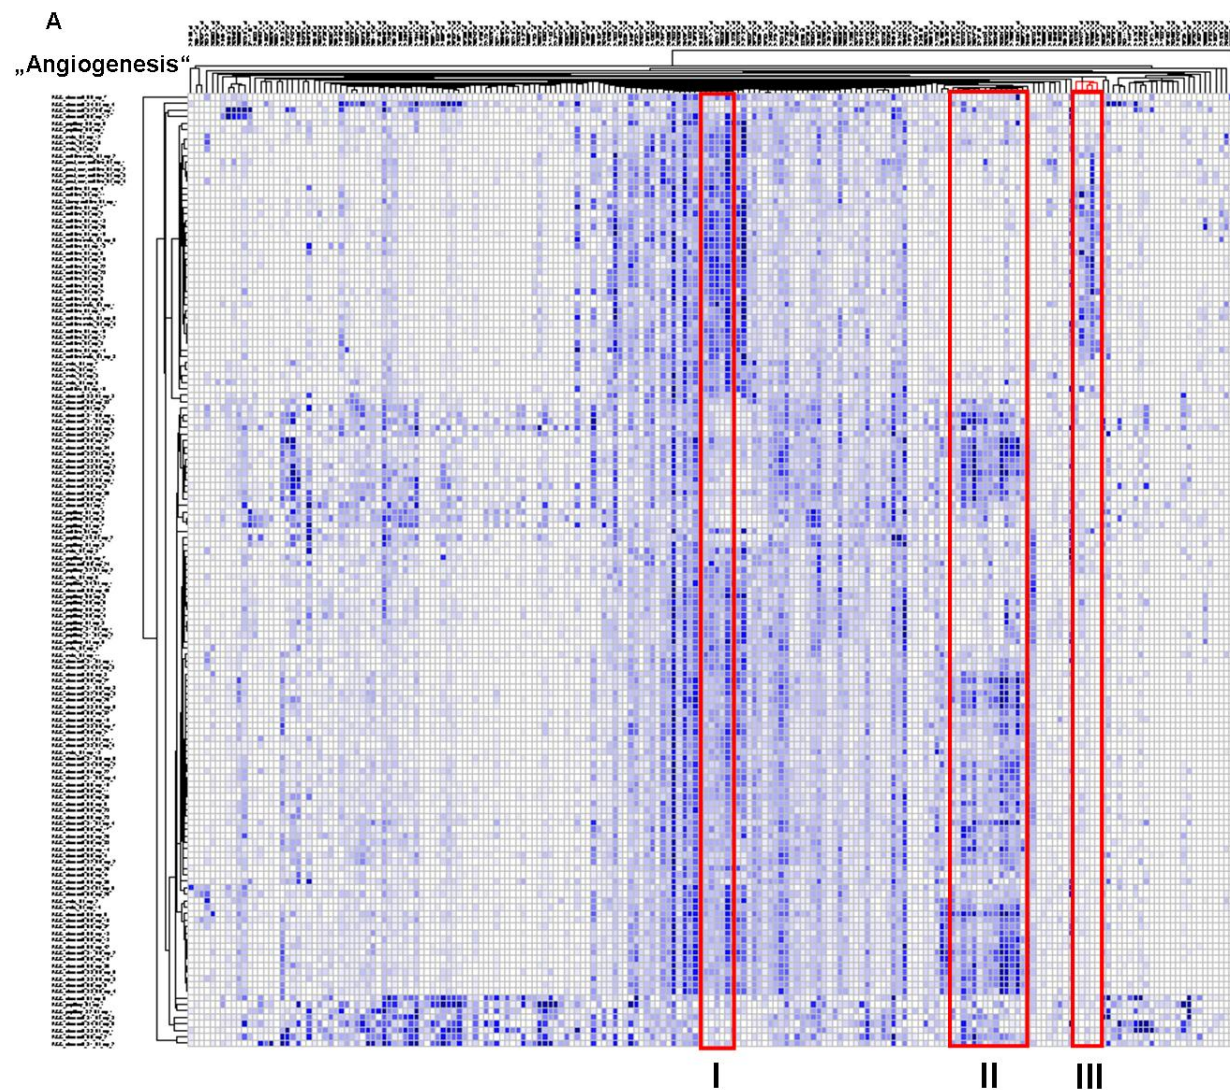

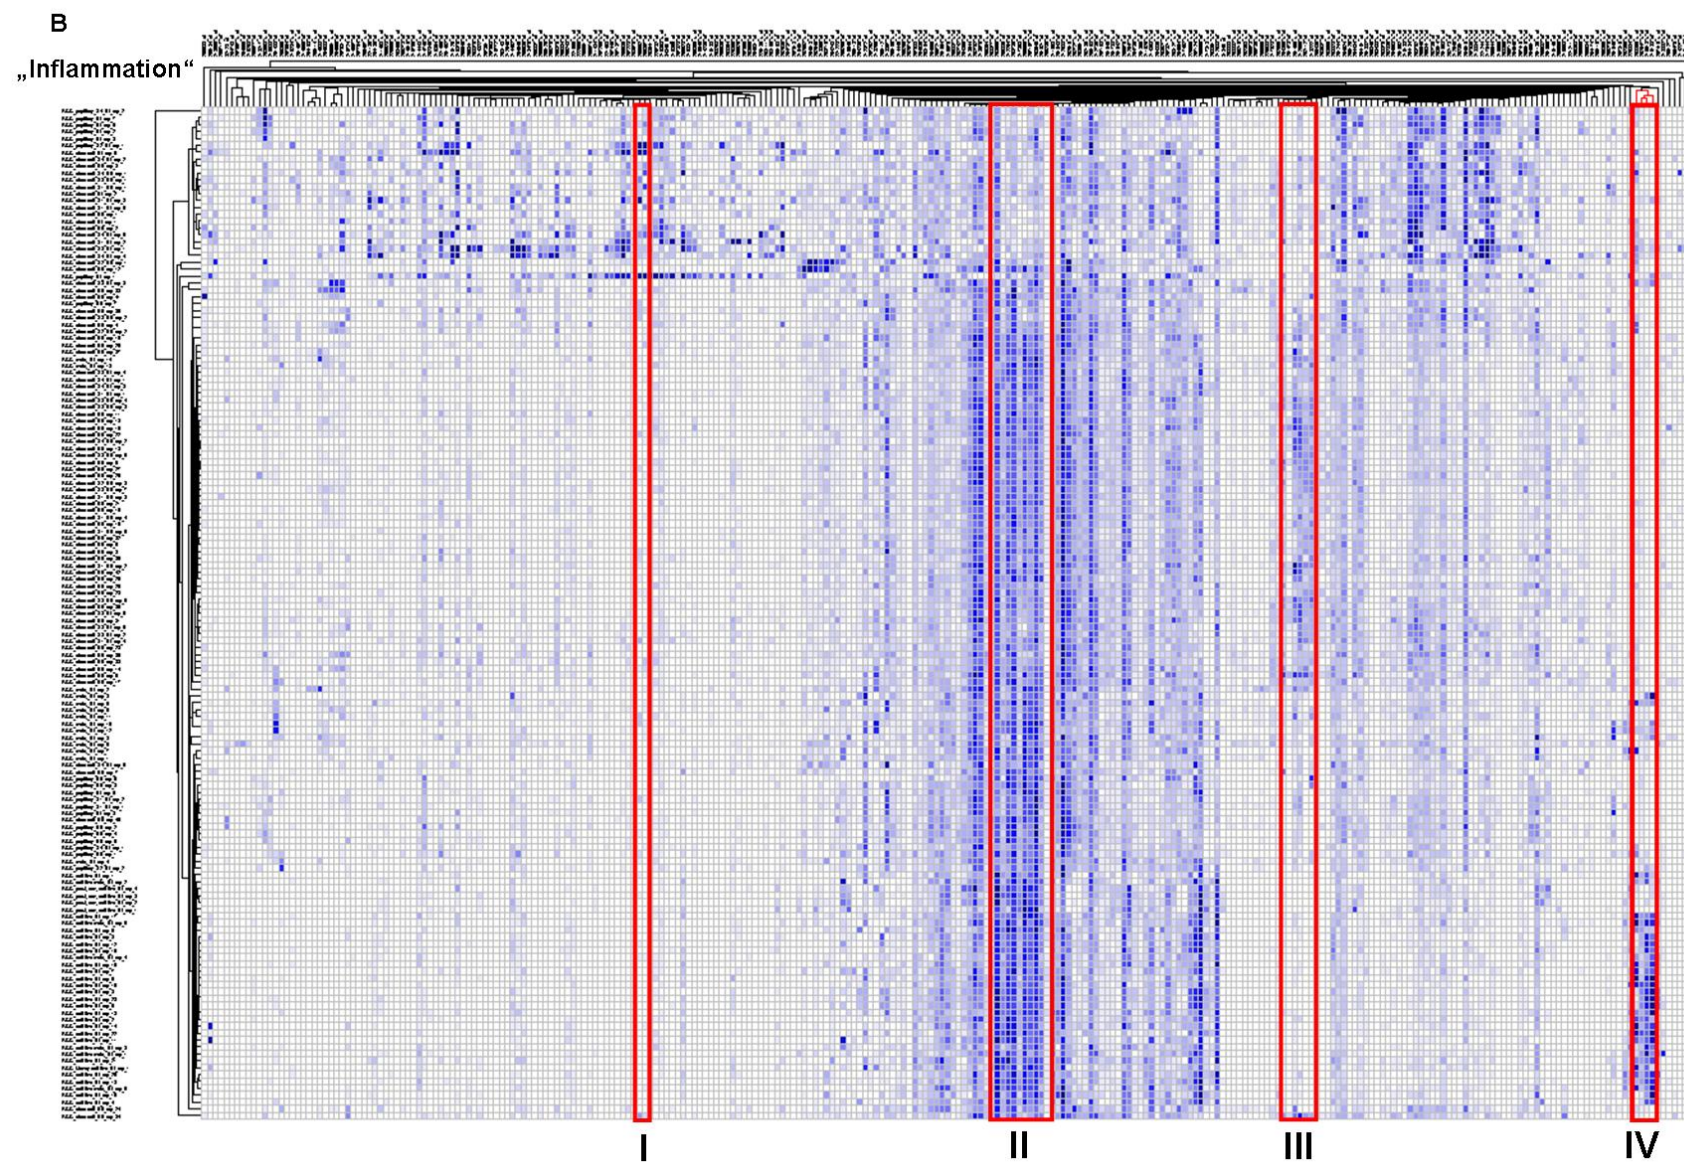

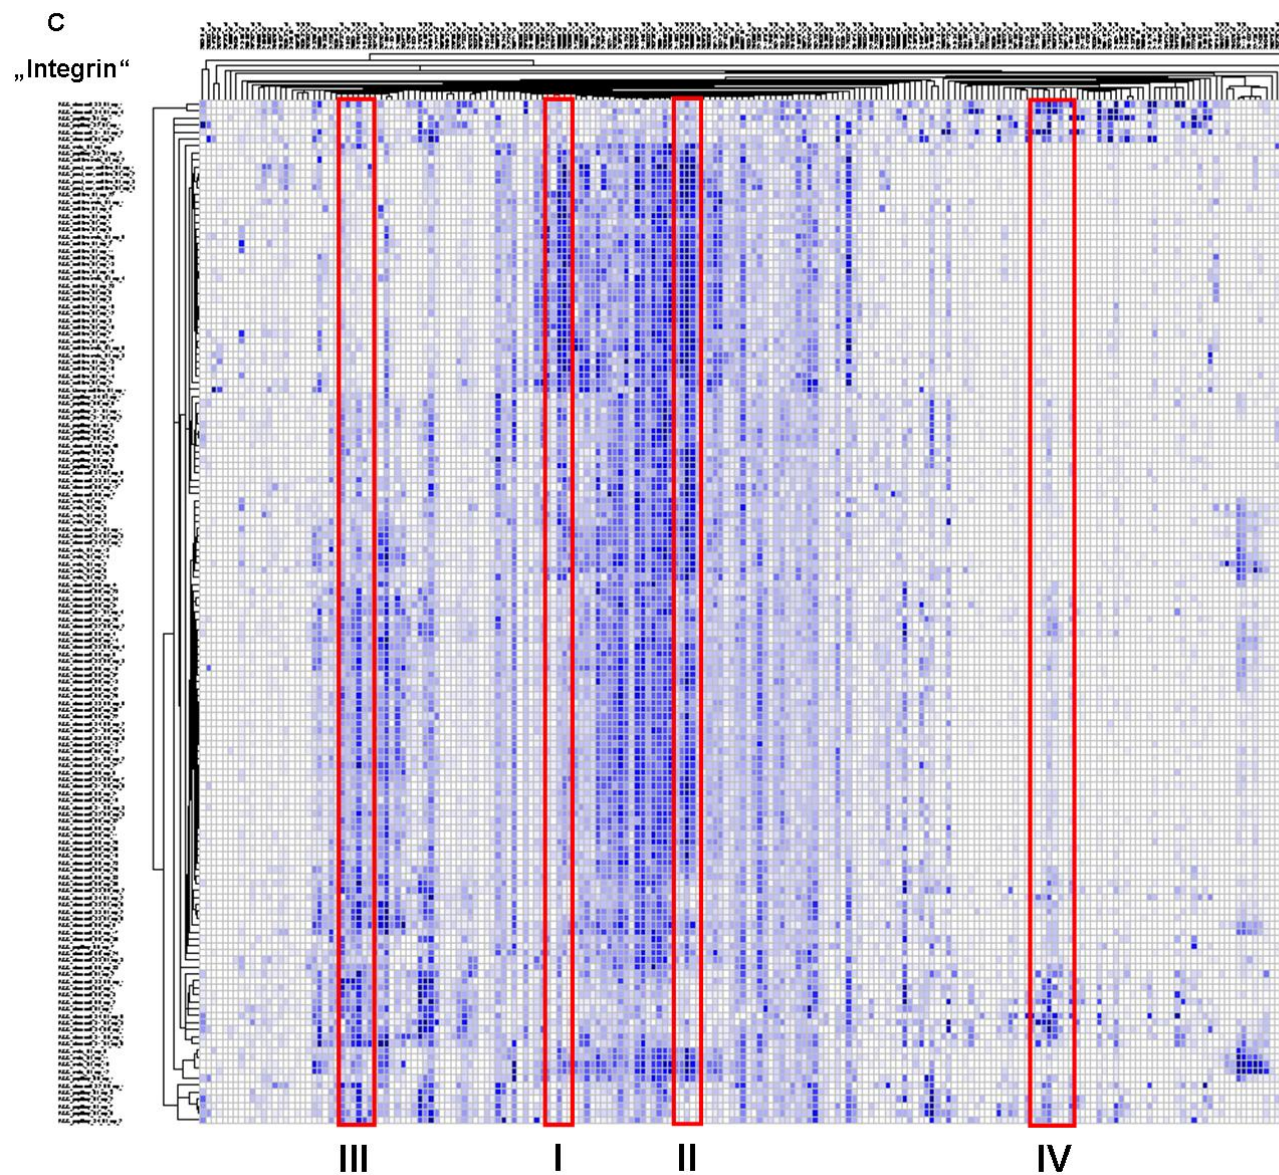

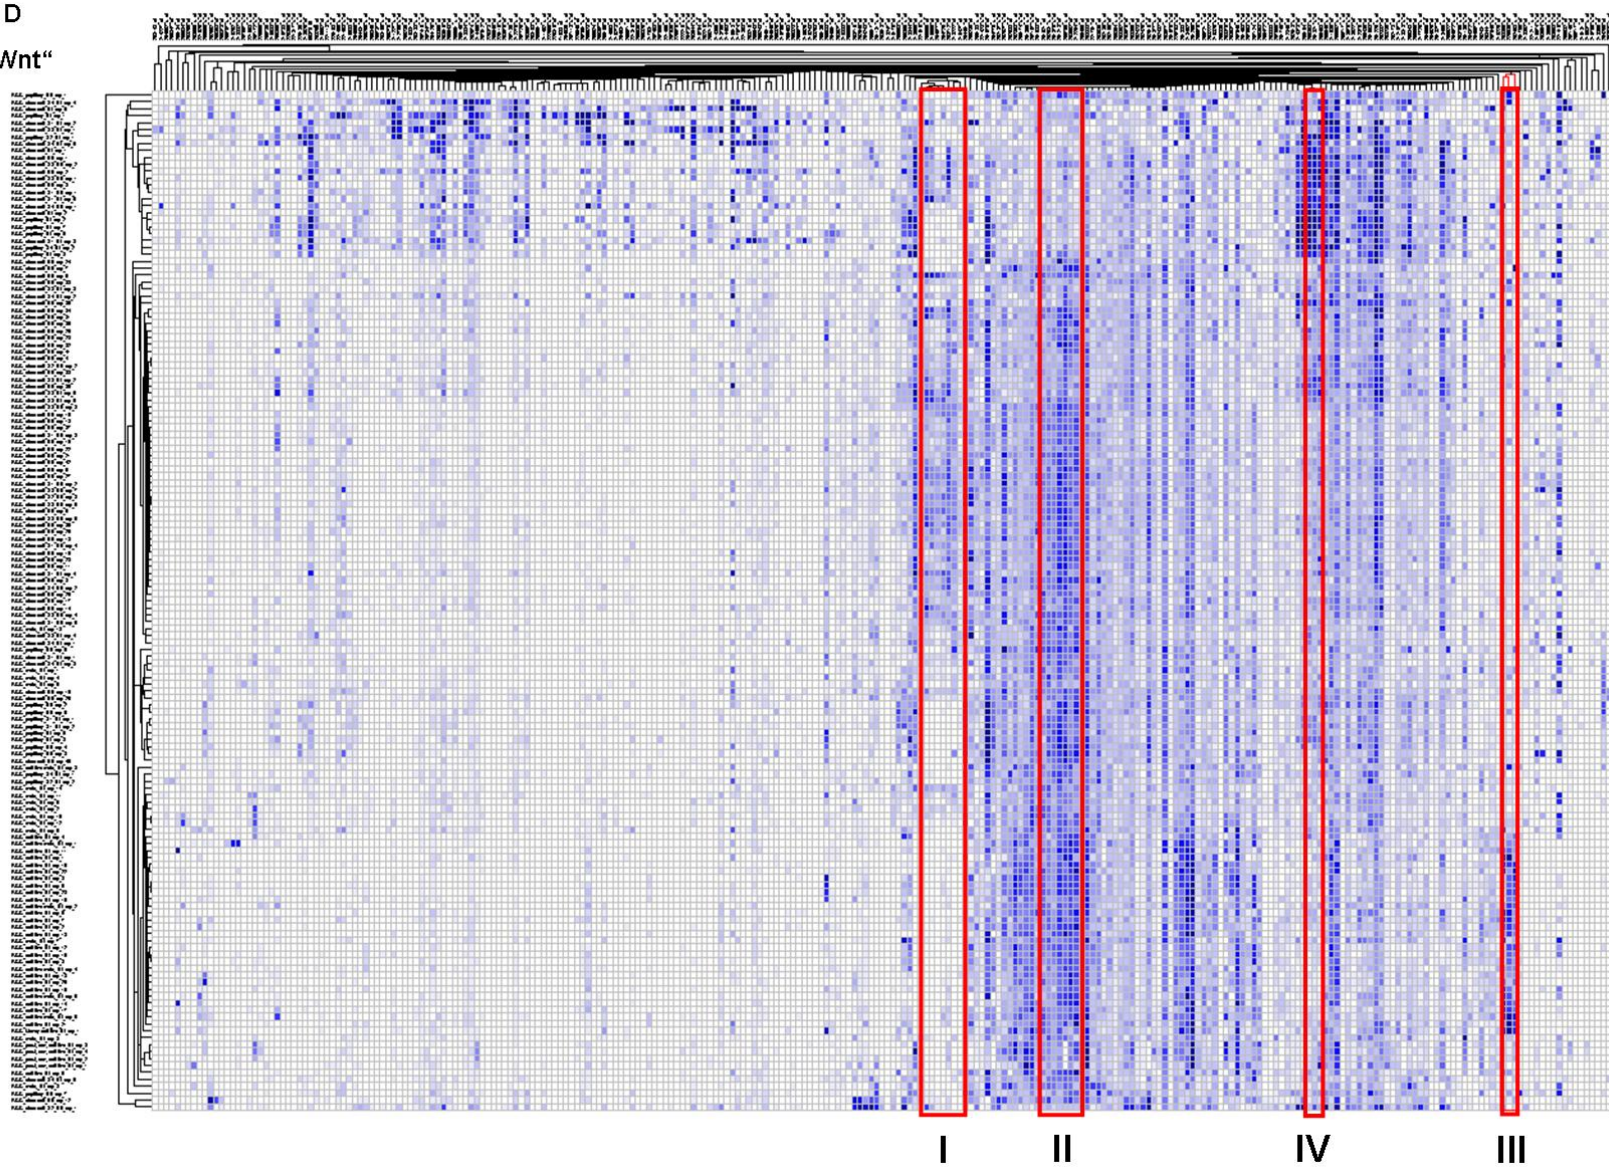

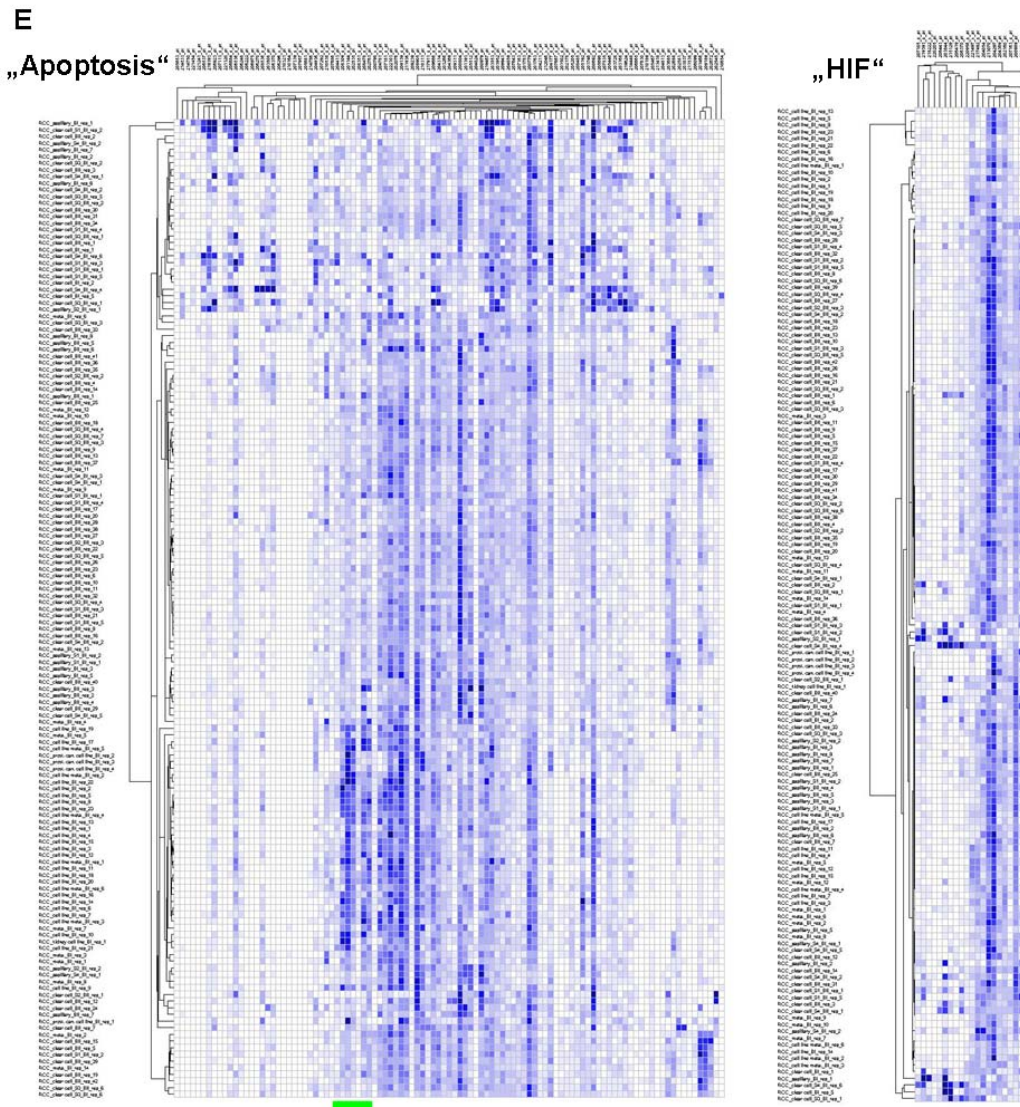

Supplement: MOESM2 [file 9463220]
